# Supplementary material
Source: publisher figshare collection journal article supplement (https://sage.figshare.com/ndownloader/files/23482661)
Supplement: Supplementary file 1 [file 23482661]

## SUPPLEMENTAL MATERIAL

**Table S1 – full PNI 7 factors descriptive statistics and intercorrelations**

| PNI subscale           | 1                | 2                | 3                | 4                | 5                | 6                | 7                | 8                | 9                | 10               | 11               | 12               | <i>M</i> | <i>SD</i> | <i>Pincus (2009)</i> | <i>Wright (2010)</i> |
|------------------------|------------------|------------------|------------------|------------------|------------------|------------------|------------------|------------------|------------------|------------------|------------------|------------------|----------|-----------|----------------------|----------------------|
| 1. CSE                 | .93<br>[.92,.94] |                  |                  |                  |                  |                  |                  |                  |                  |                  |                  |                  | 2.25     | 1.06      | <b>.93</b>           | <b>.92</b>           |
| 2. DEV                 | .65**            | .87<br>[.86,.88] |                  |                  |                  |                  |                  |                  |                  |                  |                  |                  | 1.84     | .99       | <b>.86</b>           | <b>.84</b>           |
| 3. HS                  | .51**            | .61**            | .82<br>[.80,.84] |                  |                  |                  |                  |                  |                  |                  |                  |                  | 2.57     | .96       | <b>.79</b>           | <b>.78</b>           |
| 4. ER                  | .62**            | .56**            | .46**            | .85<br>[.84,.86] |                  |                  |                  |                  |                  |                  |                  |                  | 2.21     | .89       | <b>.87</b>           | <b>.84</b>           |
| 5. GF                  | .54**            | .45**            | .49**            | .56**            | .85<br>[.84,.86] |                  |                  |                  |                  |                  |                  |                  | 2.64     | 1.02      | <b>.89</b>           | <b>.87</b>           |
| 6. SSSE                | .52**            | .42**            | .39**            | .49**            | .56**            | .80<br>[.78,.82] |                  |                  |                  |                  |                  |                  | 2.78     | .87       | <b>.78</b>           | <b>.77</b>           |
| 7. EXP                 | .02              | .07*             | .14**            | .28**            | .30**            | .24**            | .77<br>[.75,.79] |                  |                  |                  |                  |                  | 2.29     | .87       | <b>.80</b>           | <b>.79</b>           |
| 8. Pincus' (2009) GN   |                  |                  |                  |                  |                  |                  |                  | .90<br>[.89,.91] |                  |                  |                  |                  | 2.48     | .68       | N/A                  | N/A                  |
| 9. Pincus' (2009) VN   |                  |                  |                  |                  |                  |                  |                  |                  | .94<br>[.93,.95] |                  |                  |                  | 2.22     | .86       | N/A                  | N/A                  |
| 10. Wrights' (2010) GN |                  |                  |                  |                  |                  |                  |                  |                  |                  | .87<br>[.86,.88] |                  |                  | 2.57     | .70       | N/A                  | <b>.84</b>           |
| 11. Wrights' (2010) VN |                  |                  |                  |                  |                  |                  |                  |                  |                  |                  | .95<br>[.95,.95] |                  | 2.22     | .80       | N/A                  | <b>.93</b>           |
| 12. Total PNI          |                  |                  |                  |                  |                  |                  |                  |                  |                  |                  |                  | .95<br>[.95,.95] | 2.37     | .68       | N/A                  | <b>.93</b>           |

*Note:*  $N = 1061$ . Bold correlations represent Cronbach's Alpha. In parentheses: Cronbach's Alpha's confidence interval of 95%. Corresponding Cronbach's Alphas from Pincus et al. (2009) and Wright et al. (2010) are also provided. Pincus' GN/VN = the GN/VN factor specified in Pincus et al., 2009. Wright's GN/VN = the GN/VN factor specified in Wright et al., 2010.

\*\*  $p < .01$

\*  $p < .05$

**Table S2 – Brief-PNI 7 factors descriptive statistics and intercorrelations**

| PNI subscale                  | 1                       | 2                       | 3                       | 4                       | 5                       | 6                       | 7                       | 8                       | 9                       | 10                      | 11                      | 12                      | <i>M</i> | <i>SD</i> | <i>Schoenleber et al., 2015 sample 1</i> | <i>Schoenleber et al., 2015 sample 2</i> |
|-------------------------------|-------------------------|-------------------------|-------------------------|-------------------------|-------------------------|-------------------------|-------------------------|-------------------------|-------------------------|-------------------------|-------------------------|-------------------------|----------|-----------|------------------------------------------|------------------------------------------|
| <b>1. CSE</b>                 | <b>.85</b><br>[.83,.86] |                         |                         |                         |                         |                         |                         |                         |                         |                         |                         |                         | 2.07     | 1.16      | <b>.88</b>                               | <b>.87</b>                               |
| <b>2. DEV</b>                 | .59**                   | <b>.84</b><br>[.82,.86] |                         |                         |                         |                         |                         |                         |                         |                         |                         |                         | 1.62     | 1.04      | <b>.85</b>                               | <b>.85</b>                               |
| <b>3. HS</b>                  | .52**                   | .59**                   | <b>.80</b><br>[.78,.82] |                         |                         |                         |                         |                         |                         |                         |                         |                         | 2.32     | 1.08      | <b>.82</b>                               | <b>.82</b>                               |
| <b>4. ER</b>                  | .59**                   | .54**                   | .45**                   | <b>.75</b><br>[.72,.77] |                         |                         |                         |                         |                         |                         |                         |                         | 1.97     | .98       | <b>.81</b>                               | <b>.81</b>                               |
| <b>5. GF</b>                  | .51**                   | .45**                   | .48**                   | .52**                   | <b>.82</b><br>[.80,.84] |                         |                         |                         |                         |                         |                         |                         | 2.59     | 1.16      | <b>.83</b>                               | <b>.85</b>                               |
| <b>6. SSSE</b>                | .50**                   | .39**                   | .36**                   | .49**                   | .52**                   | <b>.75</b><br>[.72,.77] |                         |                         |                         |                         |                         |                         | 2.83     | .92       | <b>.71</b>                               | <b>.75</b>                               |
| <b>7. EXP</b>                 | .06                     | .07*                    | .14**                   | .30**                   | .21**                   | .21**                   | <b>.78</b><br>[.76,.80] |                         |                         |                         |                         |                         | 2.28     | 1.16      | <b>.79</b>                               | <b>.80</b>                               |
| <b>8. Pincus' (2009) GN</b>   |                         |                         |                         |                         |                         |                         |                         | <b>.86</b><br>[.85,.87] |                         |                         |                         |                         | 2.42     | .73       | <b>N/A</b>                               | <b>N/A</b>                               |
| <b>9. Pincus' (2009) VN</b>   |                         |                         |                         |                         |                         |                         |                         |                         | <b>.90</b><br>[.89,.91] |                         |                         |                         | 2.00     | .92       | <b>N/A</b>                               | <b>N/A</b>                               |
| <b>10. Wrights' (2010) GN</b> |                         |                         |                         |                         |                         |                         |                         |                         |                         | <b>.82</b><br>[.80,.84] |                         |                         | 2.57     | .75       | <b>.83</b>                               | <b>.86</b>                               |
| <b>11. Wrights' (2010) VN</b> |                         |                         |                         |                         |                         |                         |                         |                         |                         |                         | <b>.91</b><br>[.90,.92] |                         | 1.99     | .87       | <b>.93</b>                               | <b>.93</b>                               |
| <b>12. Total PNI</b>          |                         |                         |                         |                         |                         |                         |                         |                         |                         |                         |                         | <b>.92</b><br>[.91,.93] | 2.24     | .73       | <b>N/A</b>                               | <b>N/A</b>                               |

*Note:*  $N = 1061$ . Bold correlations represent Cronbach's Alpha. In parentheses: Cronbach's Alpha's confidence interval of 95%. Corresponding Cronbach's Alphas from Pincus et al. (2009) and Wright et al. (2010) are also provided. Pincus' GN/VN = the GN/VN factor specified in Pincus et al., 2009. Wright's GN/VN = the GN/VN factor specified in Wright et al., 2010.

\*\*  $p < .01$

\*  $p < .05$

For the full PNI, the CFA for the first-order 7-factor model had a significant Chi-square ( $\chi^2$  (1253) = 7875.71,  $p < .001$ ), a standardized root mean square (*SRMR*) of 0.059, a root mean square of approximation (*RMSEA*) of 0.065 (90% CI [0.063, 0.066]), a comparative fit index (*CFI*) of .896, and a Tucker- Lewis index (*TLI*) of .890. Thus, whereas the *SRMR* suggested a good fit, the *RMSEA* value was slightly above the desired cutoff and the *CFI* and *TLI* were considerably below the cutoff.

**Figure S1: CFA results of all tested models using the full PNI**

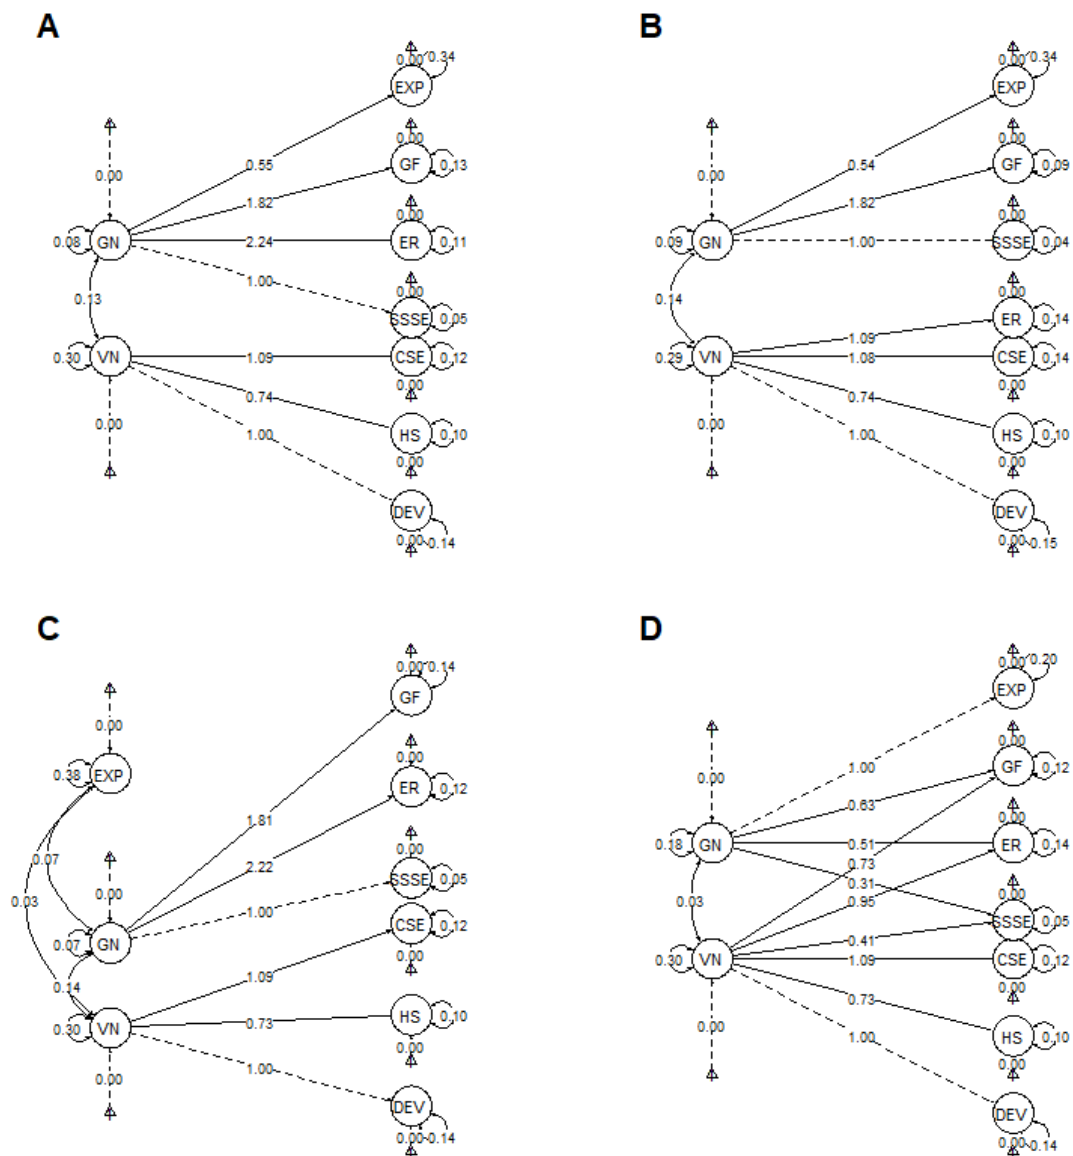

**Table S3 – Convergent and discriminant validity of full PNI factors in the current study**

| Model                                                   | PNI subscale                    | AP          |               | DASS-21     |               |
|---------------------------------------------------------|---------------------------------|-------------|---------------|-------------|---------------|
|                                                         |                                 | Mean scores | Factor scores | Mean scores | Factor scores |
| 7-factors model                                         | CSE                             | .52         | .51           | .52         | .52           |
|                                                         | DEV                             | .50         | .52           | .53         | .53           |
|                                                         | HS                              | .38         | .52           | .36         | .46           |
|                                                         | ER                              | .28         | .33           | .41         | .46           |
|                                                         | GF                              | .30         | .31           | .36         | .39           |
|                                                         | SSSE                            | .19         | .28           | .23         | .33           |
|                                                         | EXP                             | -.22        | -.18          | .06         | .08           |
| 1) Pincus et al., 2009                                  | VN (CSE, DEV, HS)               | .59         | .52           | .56         | .54           |
| Two 2 <sup>nd</sup> -order factors                      | GN (ER, GF, SSE, EXP)           | .21         | .40           | .38         | .48           |
| 2) Wright et al., 2010                                  | VN (CSE, DEV, HS, ER)           | .55         | .49           | .56         | .53           |
| Two 2 <sup>nd</sup> -order factors                      | GN (GF, SSE, EXP)               | .13         | .38           | .29         | .44           |
| 3) Karakoula et al., 2013.                              | VN (CSE, DEV, HS)               | .59         | .53           | .56         | .54           |
|                                                         | GN (ER, GF, SSSE)               | .31         | .40           | .41         | .49           |
| Three 2 <sup>nd</sup> -order factors                    | EXP                             | -.22        | -.19          | .06         | .08           |
| 4) Current study                                        | VN (CSE, DEV, HS, ER, GF, SSSE) | .52         | .53           | .54         | .54           |
| Two 2 <sup>nd</sup> -order factors, with cross loadings | GN (ER, GF, SSSE, EXP)          | .21         | -.13          | .38         | .12           |

*Note:* VN = vulnerable narcissism; GN = grandiose narcissism; DEV = devaluing; HS = hiding the self; CSE = contingent self-esteem; SSSE = self-sacrificing self-enhancement; ER = entitlement rage; GF = grandiose fantasies; EXP = exploitativeness.

**Table S4 – Model comparison for the second-order CFA models for the full PNI**

|   | Model                             | $\chi^2$ (df)  | SRMR | RMSEA [90% CI]    | CFI  | TLI  |
|---|-----------------------------------|----------------|------|-------------------|------|------|
| 0 | One factor                        | 9963.91 (1267) | .068 | .069 [.068, .071] | .879 | .874 |
| 1 | Pincus et al.,                    | 9440.06 (1266) | .066 | .068 [.066, .069] | .884 | .879 |
| 2 | Wright et al.,                    | 9436.24 (1266) | .066 | .068 [.066, .069] | .885 | .879 |
| 3 | Karakoula et al.,                 | 8624.92 (1265) | .063 | .065 [.063, .066] | .894 | .889 |
| 4 | Current study<br>(Cross-loadings) | 8563.14 (1263) | .062 | .065 [.064, .067] | .893 | .888 |

As shown in Table S3 and Table S4, both model comparison results, and validity results for the full PNI were very similar to the results for the B-PNI presented in the main text. The inter-factor correlations results were also very similar to the B-PNI results presented in the main text. Specifically, in models 1 and 2, the correlations between GN and VN were extremely high (.884 and .846, respectively), suggesting that these two factors are not well differentiated in these models. In model 3, the correlations between EXP and GN and VN in model 3 were relatively low (.399 and .098), whereas the correlation between GN and VN was high (.904). Finally, in model 4 a small correlation was found between GN and VN (.15).
